# Supplementary material
Source: publisher site journal article supplement (https://www.dovepress.com/article/231505)
Supplement: Supplementary file 1 [file get_supplementary_file.php]

**Supplemental Online Materials:**

**Childhood Maltreatment, Negative Self-Referential Processing, and Depressive Symptoms During Stress**

Ellen Joplinga, Alison Tracya, & Joelle LeMoulta

aDepartment of Psychology, University of British Columbia, Vancouver, Canada

**Content:**

**Supplemental Methods and Results:**

- Mediation Analyses: PROCESS Commands
- Supplemental Table 1: Means, standard deviations, and pearson correlations between key study variables
- Supplemental Table 2: Effects of study variables on depressive symptoms
- Supplemental Figures 1-6: Mediation models of the effect of forms of childhood maltreatment on depressive symptoms through negative self-schema

**Mediation Analyses: PROCESS Commands**

**Variable Legend**

**ZBDI:** BDI total score (z-score)

**ZSRETNegB:** SRET SRP negative bias score (z-score)

**ZAge:** Participant age (z-score)

**Sex:** Participant sex (dichotomous variable)

**MDDHx:** History of depression (dichotomous variable)

**ZCTQ_TOT:** CTQ total score (z-score)

**ZCTQ_EA:** CTQ emotional abuse score (z-score)

**ZCTQ_PA:** CTQ physical abuse score (z-score)

**ZCTQ_SA:** CTQ sexual abuse score (z-score)

**ZCTQ_EN:** CTQ emotional neglect score (z-score)

**ZCTQ_PN:** CTQ physical neglect score (z-score)

process vars= ZBDI ZSRETNegB ZCTQ_TOT ZAge Sex MDDHx

/y=ZBDI

/x=ZCTQ_TOT

/m=ZSRETNegB

/model=4.

process vars= ZBDI ZSRETNegB ZCTQ_EA ZAge Sex MDDHx

/y=ZBDI

/x=ZCTQ_EA

/m=ZSRETNegB

/model=4.

process vars= ZBDI ZSRETNegB ZCTQ_PA ZAge Sex MDDHx

/y=ZBDI

/x=ZCTQ_PA

/m=ZSRETNegB

/model=4.

process vars= ZBDI ZSRETNegB ZCTQ_SA ZAge Sex MDDHx

/y=ZBDI

/x=ZCTQ_SA

/m=ZSRETNegB

/model=4.

process vars= ZBDI ZSRETNegB ZCTQ_EN ZAge Sex MDDHx

/y=ZBDI

/x=ZCTQ_EN

/m=ZSRETNegB

/model=4.

process vars= ZBDI ZSRETNegB ZCTQ_PN ZAge Sex MDDHx

/y=ZBDI

/x=ZCTQ_PN

/m=ZSRETNegB

/model=4.

Supplemental Table 1

*Means, Standard Deviations, and Pearson Correlations Between Key Study Variables*

|  | ***M*** | ***SD*** |
| --- | --- | --- |
| **Variable** | **1.** | **2.** | **3.** | **4.** | **5.** | **6.** | **7.** | **8.** | **9.** |
| 1. SRET (SRP) Bias Score | 0.25 | 0.22 | -- |  |  |  |  |  |  |  |  |
| 2. SRET Negative Words Endorsed and Recalled | 2.37 | 1.65 | .66** | -- |  |  |  |  |  |  |  |
| 3. SRET Total Words Endorsed and Recalled | 7.90 | 2.76 | -.03 | .45** | -- |  |  |  |  |  |  |
| 4. BDI-II | 14.31 | 10.98 | .20* | .20* | -.09 | -- |  |  |  |  |  |
| 5. CTQ Total | 30.89 | 9.00 | .14 | .12 | -.24** | .25** | -- |  |  |  |  |
| 6. CTQ Emotional Neglect | 6.83 | 3.38 | .19* | .12 | -.26** | .21* | .83** | -- |  |  |  |
| 7. CTQ Physical Neglect | 5.36 | 1.14 | .15 | .11 | -.12 | .24** | .60** | .51** | -- |  |  |
| 8. CTQ Emotional Abuse | 7.37 | 3.15 | .13 | .13 | -.16 | .27** | .83** | .57** | .35** | -- |  |
| 9. CTQ Physical Abuse | 6.09 | 2.76 | .04 | -.01 | -.14 | .13 | .78** | .45** | .34** | .57** | -- |
| 10. CTQ Sexual Abuse | 5.22 | 1.32 | -.03 | .05 | .07 | .06 | .56** | .35** | .35** | .28** | .45** |

*Note*.SRET = Self-referential encoding task; SRP = Self-referential processing; BDI-II = Beck Depression Inventory (Second Edition); CTQ = Childhood Trauma Questionnaire.

** p* < .05, ** *p* < .01

Supplemental Table 2

*Effects of Study Variables on Depressive Symptoms*

| **Model** | **β** | **SE** | ***p*-value** |
| --- | --- | --- | --- |
| **Total CM**  Total CM  SRP Bias Score  Age  Sex  Depression History | 0.21  0.15  -0.02  -0.26  0.37 | 0.17  0.09  0.12  0.19  0.40 | .22  .09  .85  .17  .36 |
| **Emotional Neglect**  Emotional Neglect  SRP Bias Score  Age  Sex  Depression History | 0.16  0.15  -0.01  -0.31  0.38 | 0.12  0.09  0.10  0.20  0.39 | .19  .08  .93  .12  .33 |
| **Physical Neglect**  Physical Neglect  SRP Bias Score  Age  Sex  Depression History | 0.19  0.16  -0.03  -0.25  0.33 | 0.15  0.08  0.12  0.20  0.43 | .21  .06  .79  .20  .44 |
| **Emotional Abuse**  Emotional Abuse  SRP Bias Score  Age  Sex  Depression History | 0.24  0.16  0.004  -0.20  0.45 | 0.13  0.08  0.10  0.20  0.36 | .07  .06  .96  .30  .22 |
| **Physical Abuse**  Physical Abuse  SRP Bias Score  Age  Sex  Depression History | 0.11  0.19  0.01  -0.26  0.44 | 0.11  0.08  0.10  0.20  0.37 | .35  .03  .94  .18  .23 |
| **Sexual Abuse**  Sexual Abuse  SRP Bias Score  Age  Sex  Depression History | 0.03  0.19  -0.001  -0.27  0.43 | 0.13  0.09  0.10  0.20  0.36 | .85  .03  .99  .17  .23 |

*Note*. CM = Childhood Maltreatment; SRP = Self-referential processing.

Negative Self-Schema

Total Childhood Maltreatment

Symptoms of Depression

*b =* 0.15

[-0.02, 0.33]

*a =* 0.19

[-0.13, 0.50]

*c'* = 0.21

[-0.12, 0.53]

*c* = 0.23

[-0.11, 0.58]

*Supplemental Figure 1.* Mediation model that tests whether negative self-schemas (indexed via self-referntial processing biases) mediates the association between total childhood maltreatment and symptoms of depression. Age, sex, and history of depression were included as covariates in all paths but are not depicted here. Regression coefficients and 95% confidence intervals are presented for each path.

Negative Self-Schema

Emotional Neglect

Symptoms of Depression

*a =* 0.25

[0.01, 0.49]

*b =* 0.15

[-0.02, 0.32]

*c'* = 0.16

[-0.08, 0.41]

*c* = 0.20

[-0.05, 0.45]

*Supplemental Figure 2.* Mediation model that tests whether negative self-schemas (indexed via self-referntial processing biases) mediates the association between childhood emotional neglect and symptoms of depression. Age, sex, and history of depression were included as covariates in all paths but are not depicted here. Regression coefficients and 95% confidence intervals are presented for each path.

Negative Self-Schema

Physical Neglect

Symptoms of Depression

*b =* 0.16

[-0.004, 0.32]

*a =* 0.20

[0.04, 0.36]

*c'* = 0.19

[-0.11, 0.48]

*c* = 0.22

[-0.08, 0.52]

*Supplemental Figure 3.* Mediation model that tests whether negative self-schemas (indexed via self-referntial processing biases) mediates the association between childhood physical neglect and symptoms of depression. Age, sex, and history of depression were included as covariates in all paths but are not depicted here. Regression coefficients and 95% confidence intervals are presented for each path.

Negative Self-Schema

Emotional Abuse

Symptoms of Depression

*a =* 0.15

[-0.02, 0.32]

*b =* 0.16

[-0.01, 0.32]

*c'* = 0.24

[-0.02, 0.49]

*c* = 0.26

[-0.001, 0.52]

*Supplemental Figure 4.* Mediation model that tests whether negative self-schemas (indexed via self-referntial processing biases) mediates the association between childhood emotional abuse and symptoms of depression. Age, sex, and history of depression were included as covariates in all paths but are not depicted here. Regression coefficients and 95% confidence intervals are presented for each path.

Negative Self-Schema

Physical Abuse

Symptoms of Depression

*a =* 0.06

[-0.15, 0.26]

*b =* 0.19

[0.02, 0.35]

*c'* = 0.11

[-0.12, 0.33]

*c* = 0.12

[-0.13, 0.37]

*Supplemental Figure 5.* Mediation model that tests whether negative self-schemas (indexed via self-referntial processing biases) mediates the association between childhood physical abuse and symptoms of depression. Age, sex, and history of depression were included as covariates in all paths but are not depicted here. Regression coefficients and 95% confidence intervals are presented for each path.

Negative Self-Schema

Sexual Abuse

Symptoms of Depression

*a =* -0.01

[-0.48, 0.46]

*b =* 0.19

[0.03, 0.36]

*c'* = 0.03

[-0.23, 0.28]

*c* = 0.02

[-0.32, 0.36]

*Supplemental Figure 6.* Mediation model that tests whether negative self-schemas (indexed via self-referntial processing biases) mediates the association between childhood sexual abuse and symptoms of depression. Age, sex, and history of depression were included as covariates in all paths but are not depicted here. Regression coefficients and 95% confidence intervals are presented for each path.

Supplemental Table 2

*Effects of Study Variables on Depressive Symptoms*

| **Model** | **β** | **SE** | ***p*-value** |
| --- | --- | --- | --- |
